# Supplementary material for: Expression and release of glucose-regulated protein-78 (GRP78) in multiple myeloma
Source: PubMed Central journal article supplement (PMC5593558; doi:10.18632/oncotarget.17353), 2017-04-21
Supplement: oncotarget-08-56243-s001.pdf [file oncotarget-08-56243-s001.pdf]

## Expression and release of glucose-regulated protein-78 (GRP78) in multiple myeloma

### Supplementary Materials

**Supplementary Table 1: GRP78 expression levels in peripheral blood (PB)**

| Patients                   | GRP78 levels |          |          |                 |
|----------------------------|--------------|----------|----------|-----------------|
|                            | median       | [95% CI] | IQR      | <i>p</i> -value |
| Control P. ( <i>n</i> =6 ) | 4.0 ng/mL    | 0.6–35   | 0.7–27.5 |                 |
| MGUS ( <i>n</i> = 5)       | 3.6 ng/mL    | 0.3–50   | 1.2–50   |                 |
| NDMM pts ( <i>n</i> = 6)   | 1.3 ng/mL    | 0.2–39.1 | 0.2–14.3 |                 |
| RRMM pts. ( <i>n</i> = 6)  | 1.6 ng/mL    | 0.9–6.3  | 1.2–4.3  |                 |
| All pts (23)               | 2.0 ng/mL    | 0.7–4.5  | 0.7–10.3 | <i>p</i> = 0.4  |

Control *P* = control person, MGUS = monoclonal gammopathy undetermined significance, MM = multiple myeloma, NDMM = newly diagnosed multiple myeloma, RRMM = relapsed refractory multiple myeloma, IQR = Interquartile range.
